# Supplementary material for: Hole-conductor-free perovskite solar cells with carbon counter electrodes based on ZnO nanorod arrays
Source: Royal Society of Chemistry journal article supplement (doi:10.1039/c6cp04793a), 2016-01-01
Supplement: c6cp04793a1.pdf [file c6cp04793a1.pdf]

Supporting Information for

## Hole-Conductor-Free and Carbon Counter Electrodes Perovskite Solar Cells Based on ZnO Nanorod Arrays

B. X. Wang,<sup>a</sup> T. F. Liu<sup>b</sup>, Y. B. Zhou,<sup>a</sup> X. Chen,<sup>a</sup> X. B. Yuan<sup>a</sup>, Y. Y.  
Yang<sup>a</sup>, W. P. Liu<sup>a</sup>, J.M. Wang<sup>a</sup>, H. W. Han<sup>b\*</sup>, and Y. W. Tang<sup>a\*</sup>

<sup>a</sup> Institute of Nano-science and Technology, Central China Normal  
University, Luoyu Road 152, Wuhan 430079, China

<sup>b</sup> School of Optical and Electronic Information, Huazhong University of  
Science and Technology, Wuhan 430074, China

E-mail: [ywtang@phy.ccnu.edu.cn](mailto:ywtang@phy.ccnu.edu.cn);  
[hongwei.han@mail.hust.edu.cn](mailto:hongwei.han@mail.hust.edu.cn)

### Experimental Details

#### 1. Preparation of ZnO NR and ZnO/TiO<sub>2</sub> NR arrays

ZnO NR arrays were fabricated via hydrothermal method on a fluorinated tin oxide (FTO) glass substrates. The FTO glass substrates were first etched using Zn and HCl (2 M) aqueous solution to form two detached electrode pattern before ultrasonically cleaned with dilute detergent, diluted hydrochloric acid, and acetone successively. After that, a thin ZnO sol layer was coated on the patterned substrate by a dip-coating method. The sol solution was prepared with 0.05 M Zn(NO<sub>3</sub>)<sub>2</sub>·6H<sub>2</sub>O and 0.06 M C<sub>4</sub>H<sub>11</sub>NO<sub>2</sub> was dissolved in 100 mL ethanol. A ZnO seed film was finally obtained after being annealed at 500 °C for 30 min.

The precursor aqueous solution for the preparation of ZnO NR array films was

prepared with 1.784 g  $\text{Zn}(\text{NO}_3)_2 \cdot 6\text{H}_2\text{O}$  and 2.22 g  $\text{NH}_4\text{F}$  dissolved in 200 mL of DI water. The pH value of the solution was adjusted to 8.6 by the addition of ammonia. The precursor solution (60 mL) was then transferred to a Teflon-sealed autoclave comprising substrates pre-coated with a ZnO seed layer. The reaction was performed at 120 °C for 4 h to obtain ZnO NR array films with 1  $\mu\text{m}$  length. Finally, the resulting films were rinsed with distilled water and dried at 500 °C for 1 h.

For the ZnO/TiO<sub>2</sub> NR arrays, the substrates with ZnO NR arrays were immersed in 40 mM of  $\text{TiCl}_4$  aqueous solutions for 1 h at 70 °C, washed with distilled water and ethanol, followed by annealing at 500 °C for 30 min in air.

## **2. Preparation of TiO<sub>2</sub> NR array**

TiO<sub>2</sub> NR array was prepared on the patterned substrate via hydrothermal method. Before hydrothermal treatment, a TiO<sub>2</sub> seed layer was coated on the substrate by a spin-coating method. 68 mL tetrabutyl titanate and 16.5 mL diethanol amine was dissolved in 210 mL ethanol, following by magnetic stirring for 1 h. 100 mL ethanol and 3.6 mL DI water was dripped into the pre-solution under the magnetic stirring to achieve the TiO<sub>2</sub> sol solution. Spin-coating method was used under the rotate speed of 3000 rpm/min. Then, the substrates with TiO<sub>2</sub> sol solution was annealed at 450 °C for 1 h.

The precursor aqueous solution for the synthesis of TiO<sub>2</sub> NR array films was prepared with 24 mL concentrated hydrochloric acid and 0.8 mol tetrabutyl titanate dissolved into 24 mL of DI water, stirring for 5 min. The precursor solution (60 mL) was then transferred to a teflon-sealed autoclave comprising substrates pre-coated with a TiO<sub>2</sub> seed layer. The reaction was performed at 150 °C for 3 h to obtain TiO<sub>2</sub> NR array films with 1  $\mu\text{m}$  length. Finally, the resulting films were rinsed with distilled water and dried at 450 °C for 1 h.

## **3. Solar cell fabrication**

Screen-printing technique was used to print  $\text{ZrO}_2$ , and carbon films layer by layer onto the conductive glass coated with ZnO-TiO<sub>2</sub> core-shell NR arrays. 0.462 g  $\text{PbI}_2$  was

dissolved in 1mL anhydrous N,N-Dimethylformamide (DMF) by heating at 70 °C overnight to obtain  $\text{PbI}_2$  solution. And then, we dropwise added the  $\text{PbI}_2$  solution with a dropper drop by drop onto the prepared  $\text{ZnO/ZrO}_2$ /Carbon film, infiltrating the  $\text{PbI}_2$  solution into the film. After the films were fully filled by  $\text{PbI}_2$ , we dried the film at 50 °C for 3 hours. After that, the films were dipped into a solution of  $\text{CH}_3\text{NH}_3\text{I}$  (MAI) in 2-propanol for 15 minutes. Then it was annealed at 70 °C for 30 minutes.

#### **4. Characterization**

The X-Ray diffraction (XRD, Philips, X'pert pro, Cu Ka, 0.154056 nm) was employed to characterize the structural properties of the samples. The morphology and structure of the samples were characterized by field emission scanning electron microscopy (FE-SEM, JEOL 6700F) and transmission electron microscopy (TEM, FEI Tecnai F30). Photocurrent density voltage (J-V) curves were characterized with a Keithley 2400 source/meter and a Newport solar simulator (model 91192) giving light with AM 1.5G spectral distribution. A black mask with a circular aperture (0.12 cm<sup>2</sup>) smaller than the active area of the square solar cell (0.5 cm<sup>2</sup>) was applied on top of the cell. The incident photon conversion efficiency (IPCE) was measured using a 150 W xenon lamp (Oriel) fitted with a monochromator (Cornerstone 74004) as a monochromatic light source. Electrochemical impedance spectroscopy (EIS) of the devices was obtained on an Electrochemical Workstation (CS310). EIS measurements were carried out in the frequency range of 0.01 Hz to 100 kHz at open-circuit voltage with a potential pulse of 10 mV in amplitude.

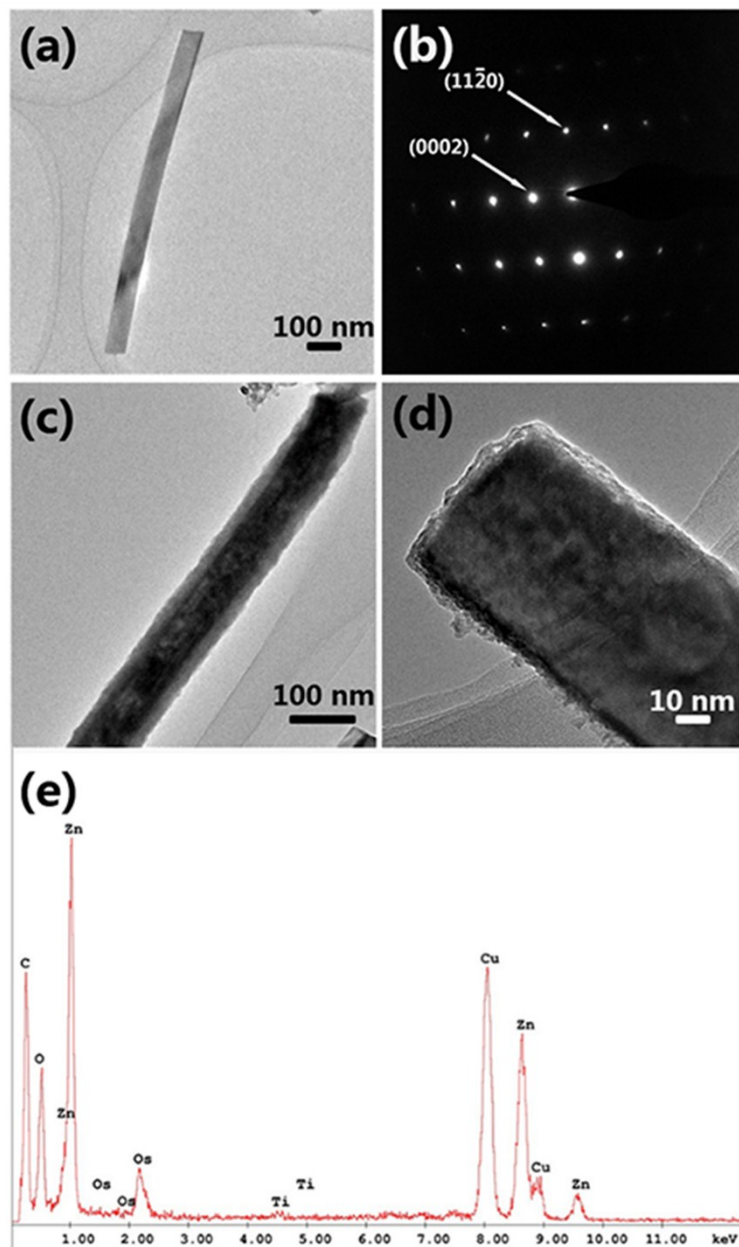

**Figure S1.** (a) The TEM image of ZnO NR; (b) The corresponding SAED pattern of the ZnO NR; (c) The TEM image of ZnO/TiO<sub>2</sub> NR; (d) The TEM image of ZnO/TiO<sub>2</sub> NR of higher magnification; (e) The EDS pattern of the ZnO/TiO<sub>2</sub> NR.

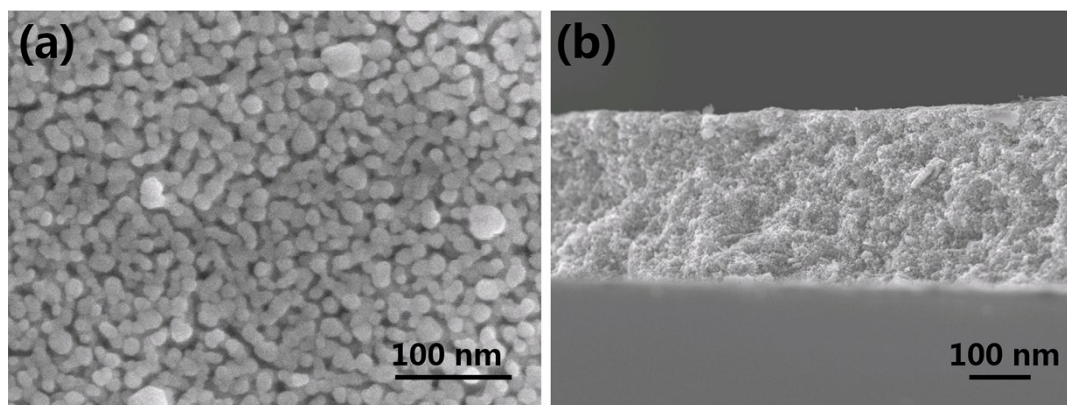

**Figure S2.** The plain and cross-section images of ZnO seed layer.

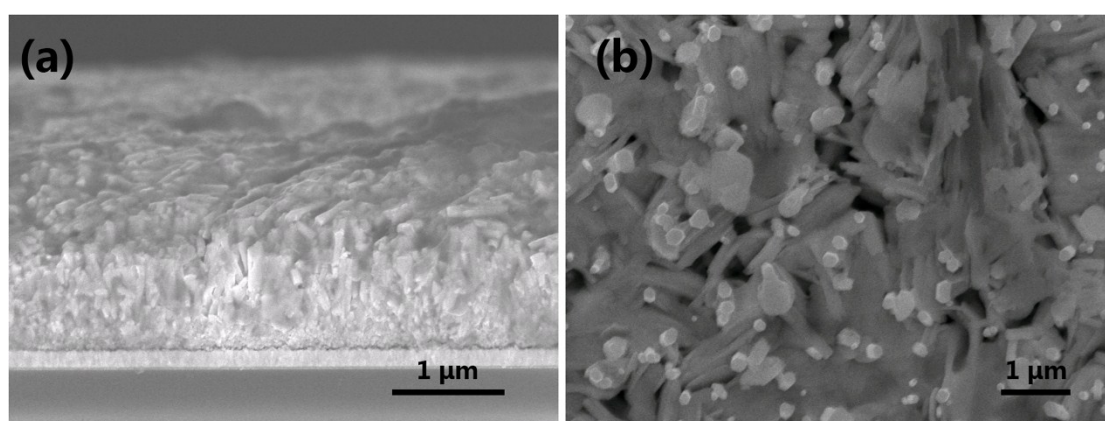

**Figure S3.** Cross-sectional (a) and plane view (b) SEM image of the ZnO NR/Perovskite.

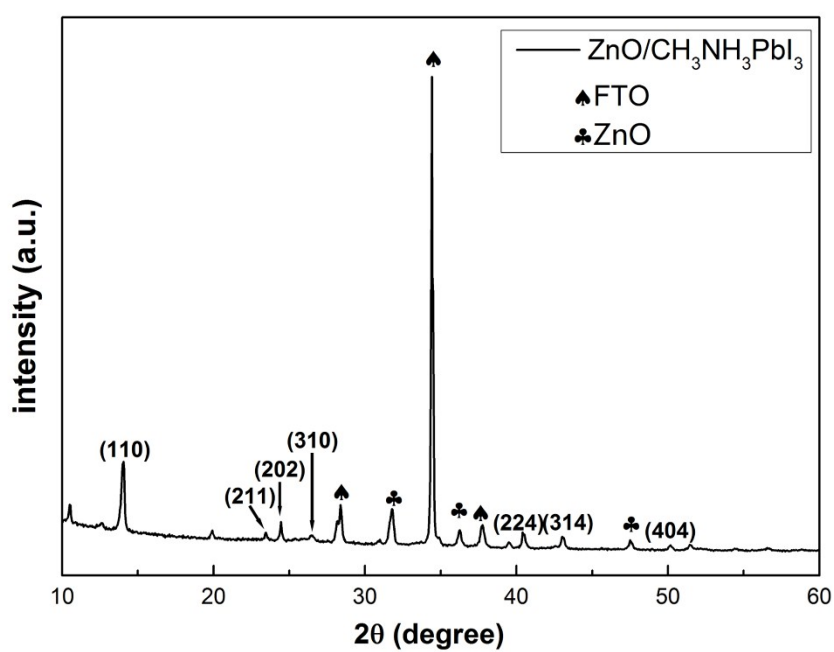

**Figure S4.** The XRD pattern of ZnO/perovskite.

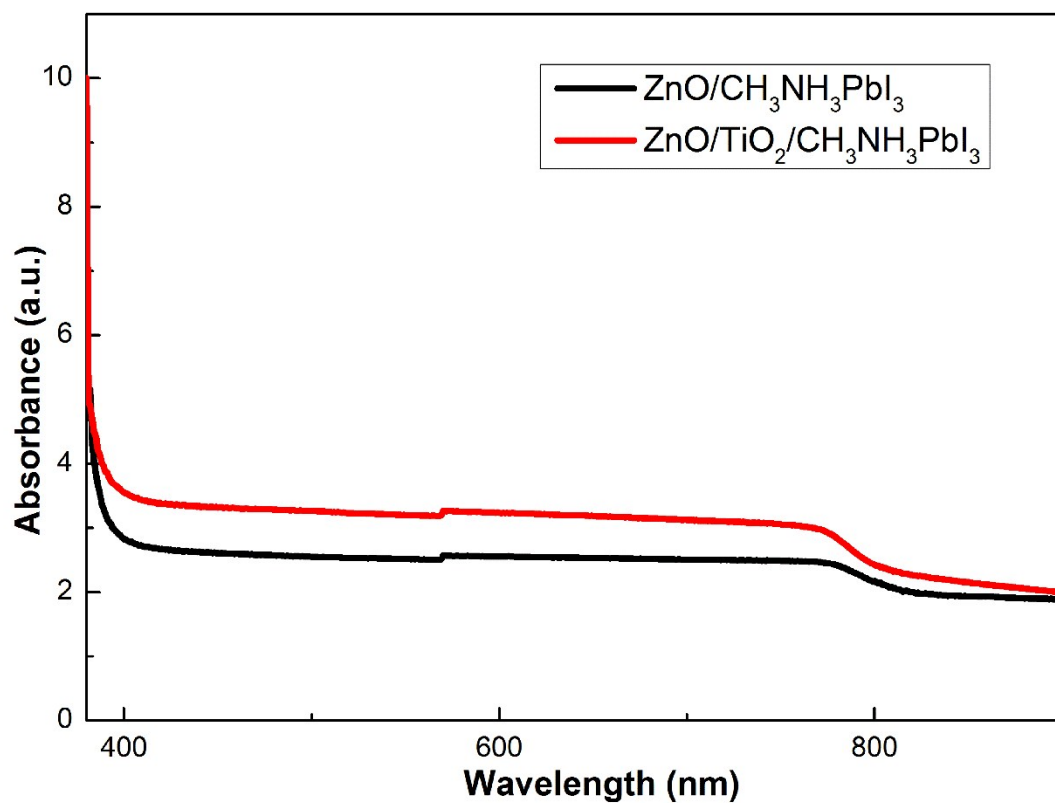

**Figure S5.** The UV-vis absorption spectra of the ZnO/perovskite and ZnO/TiO<sub>2</sub>/ perovskite.

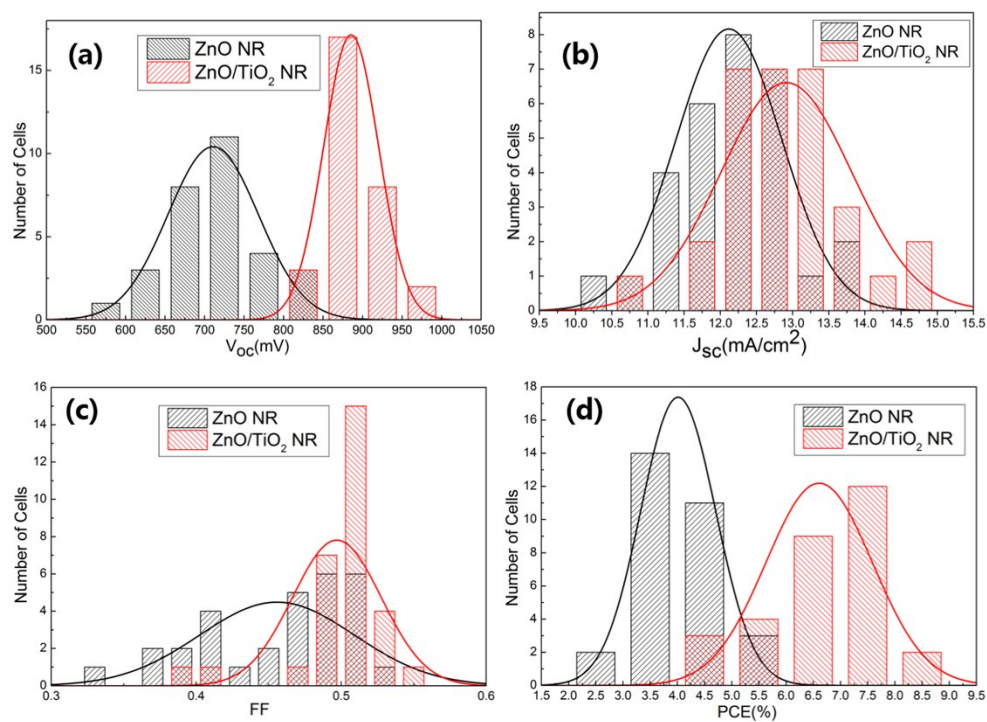

**Figure S6.** The overall distributions of performance parameters for 30 devices.

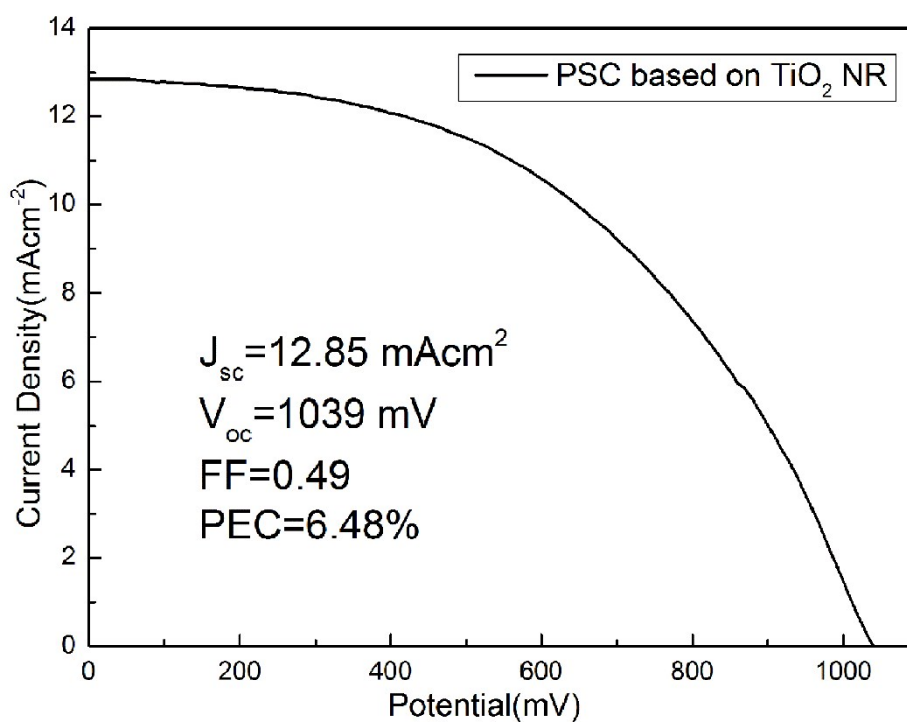

**Figure S7.** J-V curves of the PSC based on  $\text{TiO}_2$  NR array.

**Table S1.** Photovoltaic parameters of the PSCs based on ZnO NR and ZnO/ $\text{TiO}_2$  NR, respectively.

| Samples                | $J_{sc}(\text{mA} \cdot \text{cm}^{-2})$ | $V_{oc}(\text{mV})$ | FF   | PCE(%) |
|------------------------|------------------------------------------|---------------------|------|--------|
| ZnO NR                 | 14.19                                    | 843.16              | 0.46 | 5.56   |
| ZnO/ $\text{TiO}_2$ NR | 14.82                                    | 960.39              | 0.58 | 8.24   |

**Table S2.** Resistivity Values of PSC based on ZnO NR,  $\text{TiO}_2$  NR and ZnO/ $\text{TiO}_2$  NR, respectively.

| Samples                | $R_s(\Omega)$ | $R_{ct1}(\text{NR/Perovskite}) (\Omega)$ | $R_{ct2}(\text{Perovskite/CE}) (\Omega)$ |
|------------------------|---------------|------------------------------------------|------------------------------------------|
| ZnO NR                 | 273.6         | 739.3                                    | 1984                                     |
| ZnO/ $\text{TiO}_2$ NR | 352.4         | 1251                                     | 1995                                     |
| $\text{TiO}_2$ NR      | 34            | 1884                                     | 2443                                     |
